# Supplementary material for: Recent Advancement in Anticancer Compounds from Marine Organisms: Approval, Use and Bioinformatic Approaches to Predict New Targets
Source: MDPI journal article supplement (doi:10.3390/md21010024), 2022-12-28
Supplement: s1 [file s1]

Supplementary Materials

Supplementary Tables

Table S1. Biological activities of Psammaplin A and different marine sources.

| Specie                                                                          | Activity                                                                            | References                  |
|---------------------------------------------------------------------------------|-------------------------------------------------------------------------------------|-----------------------------|
|                                                                                 |                                                                                     | (Quiñoà and Crews 1987)     |
| <i>Psammaplin aplysilla</i> revised<br>as <i>Pseudoceratina purpurea</i>        | Compound discovery                                                                  |                             |
| <i>Psammaplysilla purpurea</i><br>revised as <i>Pseudoceratina<br/>purpurea</i> | Derivatives discovery                                                               | (Jiménez and Crews<br>1991) |
| Association of <i>Poecillastra sp.</i><br>and <i>Jaspis sp.</i>                 | Antibacterial effect against methicillin-<br>resistant <i>Staphylococcus aureus</i> | (Kim et al. 1999b)          |
|                                                                                 | Anticancer effect                                                                   | (Kim et al. 1999a)          |
| <i>Aplysinella rhax</i>                                                         | Chitinase Inhibitor                                                                 | (Tabudravu et al. 2002)     |
| <i>Pseudoceratina purpurea</i>                                                  | Histone deacetylase and DNA<br>methyltransferase inhibition                         | (Piña et al. 2003)          |
|                                                                                 | Inhibitor of aminopeptidase N                                                       | (Shim et al. 2004)          |
|                                                                                 | Antiviral                                                                           | (Salam et al. 2013)         |
|                                                                                 | Anticancer                                                                          | (Zhou et al. 2018)          |

**Table S2.** Most recent clinical approved anticancer compounds from marine species.

| Source                | Specie                                                                   | Compound name        | Study                    | Disease                                                     | Recruitment status     | NCT number  |
|-----------------------|--------------------------------------------------------------------------|----------------------|--------------------------|-------------------------------------------------------------|------------------------|-------------|
| Sponge                | <i>Halicondia okadai</i>                                                 | Eribulin mesylate    | Phase III<br>EMBRACE     | MCB                                                         | Completed              | NCT02753595 |
| Sponge                | <i>Pseudoceratina purpurea</i>                                           | Panobinostat         | Phase III<br>PANORAMA-1  | RRMM                                                        | Completed              | NCT01023308 |
| Tunicate              | <i>Ecteinascidia turbinata/Candidatus Endoecteinascidia frumentensis</i> | Lurbinectedin        | Phase III<br>ATLANTIS    | Metastatic Small-Cell Lung Cancer                           | Completed              | NCT02566993 |
| Tunicate              | <i>Ecteinascidia turbinata/Candidatus Endoecteinascidia frumentensis</i> | Trabectedin          | Phase IV                 | Advanced Soft Tissue Sarcoma                                | Completed              | NCT01299506 |
| Tunicate              | <i>Aplidium albicans</i>                                                 | Plitidepsin          | Phase III<br>ADMYRE      | Advanced Liposarcoma and Leiomyosarcoma                     | Completed              | NCT01343277 |
| Mollusc/Cyanobacteria | <i>Dolabella auricularia/Symploca hynoides, Lyngbya majuscula</i>        | Brentuximab vedotin  | Phase II                 | Hodgkin's Lymphoma, Systemic Anaplastic Large-Cell Lymphoma | Completed              | NCT01102426 |
| Mollusc/Cyanobacteria | -                                                                        | Polatuzumab vedotin  | Phase Ib/II              | Diffuse large B-cell lymphoma                               | Completed              | NCT01421667 |
| Mollusc/Cyanobacteria | -                                                                        | Enfortumab vedotin   | Phase III                | Locally Advanced or Metastatic Urothelial Cancer            | Completed              | NCT01992653 |
| Mollusc/Cyanobacteria | -                                                                        | Disitamab vedotin    | Phase II                 | Locally Advanced or Metastatic Gastric Cancer               | Active, not recruiting | NCT03474107 |
| Mollusc/Cyanobacteria | -                                                                        | Tisotumab vedotin    | Phase II<br>InnovaTV 204 | Locally Advanced or Metastatic Urothelial Cancer            | Completed              | NCT03556345 |
| Mollusc/Cyanobacteria | -                                                                        | Belantamab mafodotin | Phase II<br>DREAMM-2     | Recurrent Methastatic Cervical Carcinoma                    | Unknown                | NCT04264936 |
| Mollusc/Cyanobacteria | -                                                                        |                      |                          |                                                             | Active, not recruiting | NCT03438396 |
| Mollusc/Cyanobacteria | -                                                                        |                      |                          |                                                             | Active, not recruiting | NCT03525678 |

**Table S3.** List of molecules analysed by PASS software, presenting their structural chemical formula, the SMILE format, and the Mol file.

### Panobinostat

#### Chemical structure

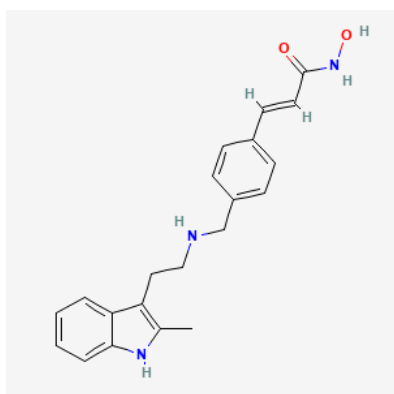

#### Chemical formula

C<sub>21</sub>H<sub>23</sub>N<sub>3</sub>O<sub>2</sub>

| Mol File                                 | Smile format                     |
|------------------------------------------|----------------------------------|
| APtclcactv10112211472D 0 0.00000 0.00000 |                                  |
| 49 51 0 0 0 0 0 0 0 0999 V2000           |                                  |
| 6.2619 -3.9838 0.0000 C 0 0 0 0 0 0 0 0  | CC1=C(C2=CC=CC=C2N1)CCNCCC3=CC=C |
| 0 0 0 0                                  | (C=C3)C=CC(=O)NO                 |
| 5.2619 -3.9838 0.0000 C 0 0 0 0 0 0 0 0  |                                  |
| 0 0 0 0                                  |                                  |
| 4.6783 -3.1791 0.0000 C 0 0 0 0 0 0 0 0  |                                  |
| 0 0 0 0                                  |                                  |
| 3.7321 -3.4838 0.0000 C 0 0 0 0 0 0 0 0  |                                  |
| 0 0 0 0                                  |                                  |
| 2.8660 -2.9838 0.0000 C 0 0 0 0 0 0 0 0  |                                  |
| 0 0 0 0                                  |                                  |
| 2.0000 -3.4838 0.0000 C 0 0 0 0 0 0 0 0  |                                  |
| 0 0 0 0                                  |                                  |
| 2.0000 -4.4838 0.0000 C 0 0 0 0 0 0 0 0  |                                  |
| 0 0 0 0                                  |                                  |
| 2.8660 -4.9838 0.0000 C 0 0 0 0 0 0 0 0  |                                  |
| 0 0 0 0                                  |                                  |

|         |         |         |          |                   |
|---------|---------|---------|----------|-------------------|
| 0 0 0 0 | 3.7321  | -4.4838 | 0.0000 C | 0 0 0 0 0 0 0 0 0 |
| 0 0 0 0 | 4.6783  | -4.7885 | 0.0000 N | 0 0 0 0 0 0 0 0 0 |
| 0 0 0 0 | 4.9889  | -2.2285 | 0.0000 C | 0 0 0 0 0 0 0 0 0 |
| 0 0 0 0 | 5.9674  | -2.0223 | 0.0000 C | 0 0 0 0 0 0 0 0 0 |
| 0 0 0 0 | 6.2781  | -1.0718 | 0.0000 N | 0 0 0 0 0 0 0 0 0 |
| 0 0 0 0 | 7.2566  | -0.8656 | 0.0000 C | 0 0 0 0 0 0 0 0 0 |
| 0 0 0 0 | 7.5673  | 0.0849  | 0.0000 C | 0 0 0 0 0 0 0 0 0 |
| 0 0 0 0 | 8.5458  | 0.2912  | 0.0000 C | 0 0 0 0 0 0 0 0 0 |
| 0 0 0 0 | 8.8564  | 1.2417  | 0.0000 C | 0 0 0 0 0 0 0 0 0 |
| 0 0 0 0 | 8.1886  | 1.9860  | 0.0000 C | 0 0 0 0 0 0 0 0 0 |
| 0 0 0 0 | 7.2101  | 1.7798  | 0.0000 C | 0 0 0 0 0 0 0 0 0 |
| 0 0 0 0 | 6.8994  | 0.8292  | 0.0000 C | 0 0 0 0 0 0 0 0 0 |
| 0 0 0 0 | 8.4993  | 2.9365  | 0.0000 C | 0 0 0 0 0 0 0 0 0 |
| 0 0 0 0 | 9.4778  | 3.1427  | 0.0000 C | 0 0 0 0 0 0 0 0 0 |
| 0 0 0 0 | 9.7884  | 4.0932  | 0.0000 C | 0 0 0 0 0 0 0 0 0 |
| 0 0 0 0 | 9.1206  | 4.8375  | 0.0000 O | 0 0 0 0 0 0 0 0 0 |
| 0 0 0 0 | 10.7669 | 4.2995  | 0.0000 N | 0 0 0 0 0 0 0 0 0 |
| 0 0 0 0 | 11.0776 | 5.2500  | 0.0000 O | 0 0 0 0 0 0 0 0 0 |
| 0 0 0 0 | 6.2619  | -4.6038 | 0.0000 H | 0 0 0 0 0 0 0 0 0 |
| 0 0 0 0 | 6.8819  | -3.9838 | 0.0000 H | 0 0 0 0 0 0 0 0 0 |
| 0 0 0 0 | 6.2619  | -3.3638 | 0.0000 H | 0 0 0 0 0 0 0 0 0 |
| 0 0 0 0 | 2.8660  | -2.3638 | 0.0000 H | 0 0 0 0 0 0 0 0 0 |
| 0 0 0 0 | 1.4631  | -3.1738 | 0.0000 H | 0 0 0 0 0 0 0 0 0 |
| 0 0 0 0 | 1.4631  | -4.7938 | 0.0000 H | 0 0 0 0 0 0 0 0 0 |
| 0 0 0 0 | 2.8660  | -5.6038 | 0.0000 H | 0 0 0 0 0 0 0 0 0 |
| 0 0 0 0 | 4.8709  | -5.3778 | 0.0000 H | 0 0 0 0 0 0 0 0 0 |

---

|         |         |        |   |   |   |   |   |   |   |   |   |   |
|---------|---------|--------|---|---|---|---|---|---|---|---|---|---|
| 4.9684  | -1.6089 | 0.0000 | H | 0 | 0 | 0 | 0 | 0 | 0 | 0 | 0 | 0 |
| 0       | 0       | 0      | 0 |   |   |   |   |   |   |   |   |   |
| 4.3751  | -2.1412 | 0.0000 | H | 0 | 0 | 0 | 0 | 0 | 0 | 0 | 0 | 0 |
| 0       | 0       | 0      | 0 |   |   |   |   |   |   |   |   |   |
| 5.9880  | -2.6420 | 0.0000 | H | 0 | 0 | 0 | 0 | 0 | 0 | 0 | 0 | 0 |
| 0       | 0       | 0      | 0 |   |   |   |   |   |   |   |   |   |
| 6.5813  | -2.1097 | 0.0000 | H | 0 | 0 | 0 | 0 | 0 | 0 | 0 | 0 | 0 |
| 0       | 0       | 0      | 0 |   |   |   |   |   |   |   |   |   |
| 5.8640  | -0.6103 | 0.0000 | H | 0 | 0 | 0 | 0 | 0 | 0 | 0 | 0 | 0 |
| 0       | 0       | 0      | 0 |   |   |   |   |   |   |   |   |   |
| 7.2772  | -1.4852 | 0.0000 | H | 0 | 0 | 0 | 0 | 0 | 0 | 0 | 0 | 0 |
| 0       | 0       | 0      | 0 |   |   |   |   |   |   |   |   |   |
| 7.8704  | -0.9529 | 0.0000 | H | 0 | 0 | 0 | 0 | 0 | 0 | 0 | 0 | 0 |
| 0       | 0       | 0      | 0 |   |   |   |   |   |   |   |   |   |
| 8.9598  | -0.1703 | 0.0000 | H | 0 | 0 | 0 | 0 | 0 | 0 | 0 | 0 | 0 |
| 0       | 0       | 0      | 0 |   |   |   |   |   |   |   |   |   |
| 9.4631  | 1.3695  | 0.0000 | H | 0 | 0 | 0 | 0 | 0 | 0 | 0 | 0 | 0 |
| 0       | 0       | 0      | 0 |   |   |   |   |   |   |   |   |   |
| 6.7960  | 2.2412  | 0.0000 | H | 0 | 0 | 0 | 0 | 0 | 0 | 0 | 0 | 0 |
| 0       | 0       | 0      | 0 |   |   |   |   |   |   |   |   |   |
| 6.2928  | 0.7014  | 0.0000 | H | 0 | 0 | 0 | 0 | 0 | 0 | 0 | 0 | 0 |
| 0       | 0       | 0      | 0 |   |   |   |   |   |   |   |   |   |
| 8.0852  | 3.3980  | 0.0000 | H | 0 | 0 | 0 | 0 | 0 | 0 | 0 | 0 | 0 |
| 0       | 0       | 0      | 0 |   |   |   |   |   |   |   |   |   |
| 9.8918  | 2.6813  | 0.0000 | H | 0 | 0 | 0 | 0 | 0 | 0 | 0 | 0 | 0 |
| 0       | 0       | 0      | 0 |   |   |   |   |   |   |   |   |   |
| 11.1810 | 3.8380  | 0.0000 | H | 0 | 0 | 0 | 0 | 0 | 0 | 0 | 0 | 0 |
| 0       | 0       | 0      | 0 |   |   |   |   |   |   |   |   |   |
| 11.6843 | 5.3778  | 0.0000 | H | 0 | 0 | 0 | 0 | 0 | 0 | 0 | 0 | 0 |
| 0       | 0       | 0      | 0 |   |   |   |   |   |   |   |   |   |
| 1       | 2       | 1      | 0 | 0 | 0 | 0 | 0 |   |   |   |   |   |
| 2       | 3       | 2      | 0 | 0 | 0 | 0 | 0 |   |   |   |   |   |
| 3       | 4       | 1      | 0 | 0 | 0 | 0 | 0 |   |   |   |   |   |
| 4       | 5       | 2      | 0 | 0 | 0 | 0 | 0 |   |   |   |   |   |
| 5       | 6       | 1      | 0 | 0 | 0 | 0 | 0 |   |   |   |   |   |
| 6       | 7       | 2      | 0 | 0 | 0 | 0 | 0 |   |   |   |   |   |
| 7       | 8       | 1      | 0 | 0 | 0 | 0 | 0 |   |   |   |   |   |
| 8       | 9       | 2      | 0 | 0 | 0 | 0 | 0 |   |   |   |   |   |
| 4       | 9       | 1      | 0 | 0 | 0 | 0 | 0 |   |   |   |   |   |
| 9       | 10      | 1      | 0 | 0 | 0 | 0 | 0 |   |   |   |   |   |
| 2       | 10      | 1      | 0 | 0 | 0 | 0 | 0 |   |   |   |   |   |
| 3       | 11      | 1      | 0 | 0 | 0 | 0 | 0 |   |   |   |   |   |
| 11      | 12      | 1      | 0 | 0 | 0 | 0 | 0 |   |   |   |   |   |
| 12      | 13      | 1      | 0 | 0 | 0 | 0 | 0 |   |   |   |   |   |
| 13      | 14      | 1      | 0 | 0 | 0 | 0 | 0 |   |   |   |   |   |
| 14      | 15      | 1      | 0 | 0 | 0 | 0 | 0 |   |   |   |   |   |
| 15      | 16      | 2      | 0 | 0 | 0 | 0 | 0 |   |   |   |   |   |
| 16      | 17      | 1      | 0 | 0 | 0 | 0 | 0 |   |   |   |   |   |
| 17      | 18      | 2      | 0 | 0 | 0 | 0 | 0 |   |   |   |   |   |
| 18      | 19      | 1      | 0 | 0 | 0 | 0 | 0 |   |   |   |   |   |
| 19      | 20      | 2      | 0 | 0 | 0 | 0 | 0 |   |   |   |   |   |
| 15      | 20      | 1      | 0 | 0 | 0 | 0 | 0 |   |   |   |   |   |

---

---

18 21 1 0 0 0 0  
21 22 2 3 0 0 0  
22 23 1 0 0 0 0  
23 24 2 0 0 0 0  
23 25 1 0 0 0 0  
25 26 1 0 0 0 0  
1 27 1 0 0 0 0  
1 28 1 0 0 0 0  
1 29 1 0 0 0 0  
5 30 1 0 0 0 0  
6 31 1 0 0 0 0  
7 32 1 0 0 0 0  
8 33 1 0 0 0 0  
10 34 1 0 0 0 0  
11 35 1 0 0 0 0  
11 36 1 0 0 0 0  
12 37 1 0 0 0 0  
12 38 1 0 0 0 0  
13 39 1 0 0 0 0  
14 40 1 0 0 0 0  
14 41 1 0 0 0 0  
16 42 1 0 0 0 0  
17 43 1 0 0 0 0  
19 44 1 0 0 0 0  
20 45 1 0 0 0 0  
21 46 1 0 0 0 0  
22 47 1 0 0 0 0  
25 48 1 0 0 0 0  
26 49 1 0 0 0 0  
M END  
\$\$\$\$

---

## Plitidepsin

---

### Chemical structure

| Mol file                                         | SMILE format                               |
|--------------------------------------------------|--------------------------------------------|
| APtclcactv10052204412D 0 0.00000 0.00000         | CCC(C)C1C(CC(=O)OC(C(=O)C(C(=O)NC(C(=O)N2C |
| 166169 0 0 0 0 0 0 0 0999 V2000                  | CCC2C(=O)N(C(C(=O)OC(C(C(=O)N1)NC(=O)C(CC( |
| 9.1558 1.1602 0.0000 C 0 0 0 0 0 0 0 0 0 0 0 0   | C)C)N(C)C(=O)C3CCCN3C(=O)C(=O)C)C)CC4=CC=  |
| 8.1567 1.1166 0.0000 C 0 0 0 0 0 0 0 0 0 0 0 0   | C(C=C4)OC)C)CC(C)C)C)C(C)C)O               |
| 7.6950 0.2296 0.0000 C 0 0 0 0 0 0 0 0 0 0 0 0   |                                            |
| 6.7711 -0.1530 0.0000 C 0 0 0 0 0 0 0 0 0 0 0 0  |                                            |
| 8.2323 -0.6138 0.0000 C 0 0 0 0 0 0 0 0 0 0 0 0  |                                            |
| 8.9394 -1.3209 0.0000 C 0 0 0 0 0 0 0 0 0 0 0 0  |                                            |
| 9.9394 -1.3209 0.0000 C 0 0 0 0 0 0 0 0 0 0 0 0  |                                            |
| 10.6465 -2.0280 0.0000 C 0 0 0 0 0 0 0 0 0 0 0 0 |                                            |
| 11.6124 -1.7692 0.0000 O 0 0 0 0 0 0 0 0 0 0 0 0 |                                            |
| 10.3877 -2.9940 0.0000 O 0 0 0 0 0 0 0 0 0 0 0 0 |                                            |
| 9.4218 -2.7351 0.0000 C 0 0 0 0 0 0 0 0 0 0 0 0  |                                            |
| 8.7147 -3.4423 0.0000 C 0 0 0 0 0 0 0 0 0 0 0 0  |                                            |
| 9.0973 -4.3661 0.0000 O 0 0 0 0 0 0 0 0 0 0 0 0  |                                            |
| 7.7147 -3.4423 0.0000 C 0 0 0 0 0 0 0 0 0 0 0 0  |                                            |
| 7.2147 -4.3083 0.0000 C 0 0 0 0 0 0 0 0 0 0 0 0  |                                            |
| 6.2147 -4.3083 0.0000 O 0 0 0 0 0 0 0 0 0 0 0 0  |                                            |
| 7.7147 -5.1743 0.0000 N 0 0 0 0 0 0 0 0 0 0 0 0  |                                            |
| 8.5807 -4.6743 0.0000 C 0 0 0 0 0 0 0 0 0 0 0 0  |                                            |
| 8.2323 -3.6138 0.0000 C 0 0 0 0 0 0 0 0 0 0 0 0  |                                            |
| 7.2479 -3.7900 0.0000 O 0 0 0 0 0 0 0 0 0 0 0 0  |                                            |
| 8.2323 -2.6138 0.0000 N 0 0 0 0 0 0 0 0 0 0 0 0  |                                            |
| 9.4805 -1.7860 0.0000 C 0 0 0 0 0 0 0 0 0 0 0 0  |                                            |
| 8.9392 -0.3894 0.0000 C 0 0 0 0 0 0 0 0 0 0 0 0  |                                            |
| 7.4591 -0.6189 0.0000 C 0 0 0 0 0 0 0 0 0 0 0 0  |                                            |
| 7.3663 -2.1138 0.0000 C 0 0 0 0 0 0 0 0 0 0 0 0  |                                            |
| 6.5002 -2.6138 0.0000 C 0 0 0 0 0 0 0 0 0 0 0 0  |                                            |

[illegible]



[illegible]

|         |         |          |   |   |   |   |   |   |   |   |   |   |   |   |
|---------|---------|----------|---|---|---|---|---|---|---|---|---|---|---|---|
| 4.0650  | 6.2512  | 0.0000 H | 0 | 0 | 0 | 0 | 0 | 0 | 0 | 0 | 0 | 0 | 0 | 0 |
| 6.5589  | 1.6138  | 0.0000 H | 0 | 0 | 0 | 0 | 0 | 0 | 0 | 0 | 0 | 0 | 0 | 0 |
| 6.1883  | 2.4085  | 0.0000 H | 0 | 0 | 0 | 0 | 0 | 0 | 0 | 0 | 0 | 0 | 0 | 0 |
| 5.3936  | 2.0379  | 0.0000 H | 0 | 0 | 0 | 0 | 0 | 0 | 0 | 0 | 0 | 0 | 0 | 0 |
| 6.3748  | -2.5285 | 0.0000 H | 0 | 0 | 0 | 0 | 0 | 0 | 0 | 0 | 0 | 0 | 0 | 0 |
| 6.5132  | -1.7435 | 0.0000 H | 0 | 0 | 0 | 0 | 0 | 0 | 0 | 0 | 0 | 0 | 0 | 0 |
| 4.1366  | -2.0634 | 0.0000 H | 0 | 0 | 0 | 0 | 0 | 0 | 0 | 0 | 0 | 0 | 0 | 0 |
| 3.0953  | -3.3043 | 0.0000 H | 0 | 0 | 0 | 0 | 0 | 0 | 0 | 0 | 0 | 0 | 0 | 0 |
| 5.2447  | -5.1079 | 0.0000 H | 0 | 0 | 0 | 0 | 0 | 0 | 0 | 0 | 0 | 0 | 0 | 0 |
| 6.2861  | -3.8669 | 0.0000 H | 0 | 0 | 0 | 0 | 0 | 0 | 0 | 0 | 0 | 0 | 0 | 0 |
| 2.5280  | -4.3335 | 0.0000 H | 0 | 0 | 0 | 0 | 0 | 0 | 0 | 0 | 0 | 0 | 0 | 0 |
| 1.8098  | -4.8365 | 0.0000 H | 0 | 0 | 0 | 0 | 0 | 0 | 0 | 0 | 0 | 0 | 0 | 0 |
| 2.3127  | -5.5547 | 0.0000 H | 0 | 0 | 0 | 0 | 0 | 0 | 0 | 0 | 0 | 0 | 0 | 0 |
| 4.6342  | -1.4938 | 0.0000 H | 0 | 0 | 0 | 0 | 0 | 0 | 0 | 0 | 0 | 0 | 0 | 0 |
| 4.0142  | -2.1138 | 0.0000 H | 0 | 0 | 0 | 0 | 0 | 0 | 0 | 0 | 0 | 0 | 0 | 0 |
| 4.6342  | -2.7338 | 0.0000 H | 0 | 0 | 0 | 0 | 0 | 0 | 0 | 0 | 0 | 0 | 0 | 0 |
| 10.1065 | -5.1450 | 0.0000 H | 0 | 0 | 0 | 0 | 0 | 0 | 0 | 0 | 0 | 0 | 0 | 0 |
| 9.6468  | -4.4938 | 0.0000 H | 0 | 0 | 0 | 0 | 0 | 0 | 0 | 0 | 0 | 0 | 0 | 0 |
| 9.0168  | -5.8294 | 0.0000 H | 0 | 0 | 0 | 0 | 0 | 0 | 0 | 0 | 0 | 0 | 0 | 0 |
| 10.2279 | -7.0712 | 0.0000 H | 0 | 0 | 0 | 0 | 0 | 0 | 0 | 0 | 0 | 0 | 0 | 0 |
| 11.0506 | -6.7680 | 0.0000 H | 0 | 0 | 0 | 0 | 0 | 0 | 0 | 0 | 0 | 0 | 0 | 0 |
| 10.7475 | -5.9453 | 0.0000 H | 0 | 0 | 0 | 0 | 0 | 0 | 0 | 0 | 0 | 0 | 0 | 0 |
| 8.4052  | -6.1595 | 0.0000 H | 0 | 0 | 0 | 0 | 0 | 0 | 0 | 0 | 0 | 0 | 0 | 0 |
| 8.2564  | -7.0236 | 0.0000 H | 0 | 0 | 0 | 0 | 0 | 0 | 0 | 0 | 0 | 0 | 0 | 0 |
| 9.1205  | -7.1725 | 0.0000 H | 0 | 0 | 0 | 0 | 0 | 0 | 0 | 0 | 0 | 0 | 0 | 0 |
| 7.5468  | -2.2777 | 0.0000 H | 0 | 0 | 0 | 0 | 0 | 0 | 0 | 0 | 0 | 0 | 0 | 0 |
| 6.6733  | -2.2013 | 0.0000 H | 0 | 0 | 0 | 0 | 0 | 0 | 0 | 0 | 0 | 0 | 0 | 0 |
| 6.5969  | -3.0747 | 0.0000 H | 0 | 0 | 0 | 0 | 0 | 0 | 0 | 0 | 0 | 0 | 0 | 0 |
| 9.6191  | -1.8288 | 0.0000 H | 0 | 0 | 0 | 0 | 0 | 0 | 0 | 0 | 0 | 0 | 0 | 0 |
| 10.0471 | -1.0486 | 0.0000 H | 0 | 0 | 0 | 0 | 0 | 0 | 0 | 0 | 0 | 0 | 0 | 0 |
| 9.7472  | -0.2247 | 0.0000 H | 0 | 0 | 0 | 0 | 0 | 0 | 0 | 0 | 0 | 0 | 0 | 0 |
| 8.9232  | -0.5246 | 0.0000 H | 0 | 0 | 0 | 0 | 0 | 0 | 0 | 0 | 0 | 0 | 0 | 0 |
| 8.1937  | -0.9711 | 0.0000 H | 0 | 0 | 0 | 0 | 0 | 0 | 0 | 0 | 0 | 0 | 0 | 0 |
| 7.4343  | -1.4096 | 0.0000 H | 0 | 0 | 0 | 0 | 0 | 0 | 0 | 0 | 0 | 0 | 0 | 0 |
| 7.8728  | -2.1689 | 0.0000 H | 0 | 0 | 0 | 0 | 0 | 0 | 0 | 0 | 0 | 0 | 0 | 0 |
| 8.8430  | -2.7948 | 0.0000 H | 0 | 0 | 0 | 0 | 0 | 0 | 0 | 0 | 0 | 0 | 0 | 0 |
| 1       | 2       | 1        | 0 | 0 | 0 | 0 |   |   |   |   |   |   |   |   |
| 2       | 3       | 1        | 0 | 0 | 0 | 0 |   |   |   |   |   |   |   |   |

---

|    |    |   |   |   |   |   |
|----|----|---|---|---|---|---|
| 17 | 18 | 1 | 0 | 0 | 0 | 0 |
| 18 | 19 | 1 | 0 | 0 | 0 | 0 |
| 19 | 20 | 2 | 0 | 0 | 0 | 0 |
| 19 | 21 | 1 | 0 | 0 | 0 | 0 |
| 21 | 22 | 1 | 0 | 0 | 0 | 0 |
| 22 | 23 | 1 | 0 | 0 | 0 | 0 |
| 23 | 24 | 1 | 0 | 0 | 0 | 0 |
| 24 | 25 | 1 | 0 | 0 | 0 | 0 |
| 21 | 25 | 1 | 0 | 0 | 0 | 0 |
| 25 | 26 | 1 | 0 | 0 | 0 | 0 |
| 26 | 27 | 2 | 0 | 0 | 0 | 0 |
| 26 | 28 | 1 | 0 | 0 | 0 | 0 |
| 28 | 29 | 1 | 0 | 0 | 0 | 0 |
| 29 | 30 | 1 | 0 | 0 | 0 | 0 |
| 30 | 31 | 2 | 0 | 0 | 0 | 0 |
| 30 | 32 | 1 | 0 | 0 | 0 | 0 |
| 32 | 33 | 1 | 0 | 0 | 0 | 0 |
| 33 | 34 | 1 | 0 | 0 | 0 | 0 |
| 34 | 35 | 1 | 0 | 0 | 0 | 0 |
| 35 | 36 | 2 | 0 | 0 | 0 | 0 |
| 35 | 37 | 1 | 0 | 0 | 0 | 0 |
| 5  | 37 | 1 | 0 | 0 | 0 | 0 |
| 34 | 38 | 1 | 0 | 0 | 0 | 0 |
| 38 | 39 | 1 | 0 | 0 | 0 | 0 |
| 39 | 40 | 2 | 0 | 0 | 0 | 0 |
| 39 | 41 | 1 | 0 | 0 | 0 | 0 |
| 41 | 42 | 1 | 0 | 0 | 0 | 0 |
| 42 | 43 | 1 | 0 | 0 | 0 | 0 |
| 43 | 44 | 1 | 0 | 0 | 0 | 0 |
| 43 | 45 | 1 | 0 | 0 | 0 | 0 |
| 41 | 46 | 1 | 0 | 0 | 0 | 0 |
| 46 | 47 | 1 | 0 | 0 | 0 | 0 |
| 46 | 48 | 1 | 0 | 0 | 0 | 0 |
| 48 | 49 | 2 | 0 | 0 | 0 | 0 |
| 48 | 50 | 1 | 0 | 0 | 0 | 0 |
| 50 | 51 | 1 | 0 | 0 | 0 | 0 |
| 51 | 52 | 1 | 0 | 0 | 0 | 0 |
| 52 | 53 | 1 | 0 | 0 | 0 | 0 |
| 53 | 54 | 1 | 0 | 0 | 0 | 0 |
| 50 | 54 | 1 | 0 | 0 | 0 | 0 |
| 54 | 55 | 1 | 0 | 0 | 0 | 0 |
| 55 | 56 | 2 | 0 | 0 | 0 | 0 |
| 55 | 57 | 1 | 0 | 0 | 0 | 0 |
| 57 | 58 | 2 | 0 | 0 | 0 | 0 |
| 57 | 59 | 1 | 0 | 0 | 0 | 0 |
| 33 | 60 | 1 | 0 | 0 | 0 | 0 |
| 29 | 61 | 1 | 0 | 0 | 0 | 0 |
| 61 | 62 | 1 | 0 | 0 | 0 | 0 |
| 62 | 63 | 2 | 0 | 0 | 0 | 0 |
| 63 | 64 | 1 | 0 | 0 | 0 | 0 |
| 64 | 65 | 2 | 0 | 0 | 0 | 0 |
| 65 | 66 | 1 | 0 | 0 | 0 | 0 |

---

---

|       |   |   |   |   |   |
|-------|---|---|---|---|---|
| 66 67 | 2 | 0 | 0 | 0 | 0 |
| 62 67 | 1 | 0 | 0 | 0 | 0 |
| 65 68 | 1 | 0 | 0 | 0 | 0 |
| 68 69 | 1 | 0 | 0 | 0 | 0 |
| 28 70 | 1 | 0 | 0 | 0 | 0 |
| 18 71 | 1 | 0 | 0 | 0 | 0 |
| 71 72 | 1 | 0 | 0 | 0 | 0 |
| 72 73 | 1 | 0 | 0 | 0 | 0 |
| 72 74 | 1 | 0 | 0 | 0 | 0 |
| 14 75 | 1 | 0 | 0 | 0 | 0 |
| 11 76 | 1 | 0 | 0 | 0 | 0 |
| 76 77 | 1 | 0 | 0 | 0 | 0 |
| 76 78 | 1 | 0 | 0 | 0 | 0 |
| 6 79  | 1 | 0 | 0 | 0 | 0 |
| 1 80  | 1 | 0 | 0 | 0 | 0 |
| 1 81  | 1 | 0 | 0 | 0 | 0 |
| 1 82  | 1 | 0 | 0 | 0 | 0 |
| 2 83  | 1 | 0 | 0 | 0 | 0 |
| 2 84  | 1 | 0 | 0 | 0 | 0 |
| 3 85  | 1 | 0 | 0 | 0 | 0 |
| 4 86  | 1 | 0 | 0 | 0 | 0 |
| 4 87  | 1 | 0 | 0 | 0 | 0 |
| 4 88  | 1 | 0 | 0 | 0 | 0 |
| 5 89  | 1 | 0 | 0 | 0 | 0 |
| 6 90  | 1 | 0 | 0 | 0 | 0 |
| 7 91  | 1 | 0 | 0 | 0 | 0 |
| 7 92  | 1 | 0 | 0 | 0 | 0 |
| 11 93 | 1 | 0 | 0 | 0 | 0 |
| 14 94 | 1 | 0 | 0 | 0 | 0 |
| 17 95 | 1 | 0 | 0 | 0 | 0 |
| 18 96 | 1 | 0 | 0 | 0 | 0 |
| 22 97 | 1 | 0 | 0 | 0 | 0 |
| 22 98 | 1 | 0 | 0 | 0 | 0 |
| 23 99 | 1 | 0 | 0 | 0 | 0 |
| 23100 | 1 | 0 | 0 | 0 | 0 |
| 24101 | 1 | 0 | 0 | 0 | 0 |
| 24102 | 1 | 0 | 0 | 0 | 0 |
| 25103 | 1 | 0 | 0 | 0 | 0 |
| 29104 | 1 | 0 | 0 | 0 | 0 |
| 33105 | 1 | 0 | 0 | 0 | 0 |
| 34106 | 1 | 0 | 0 | 0 | 0 |
| 37107 | 1 | 0 | 0 | 0 | 0 |
| 38108 | 1 | 0 | 0 | 0 | 0 |
| 41109 | 1 | 0 | 0 | 0 | 0 |
| 42110 | 1 | 0 | 0 | 0 | 0 |
| 42111 | 1 | 0 | 0 | 0 | 0 |
| 43112 | 1 | 0 | 0 | 0 | 0 |
| 44113 | 1 | 0 | 0 | 0 | 0 |
| 44114 | 1 | 0 | 0 | 0 | 0 |
| 44115 | 1 | 0 | 0 | 0 | 0 |
| 45116 | 1 | 0 | 0 | 0 | 0 |
| 45117 | 1 | 0 | 0 | 0 | 0 |

---

---

|       |   |   |   |   |   |
|-------|---|---|---|---|---|
| 45118 | 1 | 0 | 0 | 0 | 0 |
| 47119 | 1 | 0 | 0 | 0 | 0 |
| 47120 | 1 | 0 | 0 | 0 | 0 |
| 47121 | 1 | 0 | 0 | 0 | 0 |
| 50122 | 1 | 0 | 0 | 0 | 0 |
| 51123 | 1 | 0 | 0 | 0 | 0 |
| 51124 | 1 | 0 | 0 | 0 | 0 |
| 52125 | 1 | 0 | 0 | 0 | 0 |
| 52126 | 1 | 0 | 0 | 0 | 0 |
| 53127 | 1 | 0 | 0 | 0 | 0 |
| 53128 | 1 | 0 | 0 | 0 | 0 |
| 59129 | 1 | 0 | 0 | 0 | 0 |
| 59130 | 1 | 0 | 0 | 0 | 0 |
| 59131 | 1 | 0 | 0 | 0 | 0 |
| 60132 | 1 | 0 | 0 | 0 | 0 |
| 60133 | 1 | 0 | 0 | 0 | 0 |
| 60134 | 1 | 0 | 0 | 0 | 0 |
| 61135 | 1 | 0 | 0 | 0 | 0 |
| 61136 | 1 | 0 | 0 | 0 | 0 |
| 63137 | 1 | 0 | 0 | 0 | 0 |
| 64138 | 1 | 0 | 0 | 0 | 0 |
| 66139 | 1 | 0 | 0 | 0 | 0 |
| 67140 | 1 | 0 | 0 | 0 | 0 |
| 69141 | 1 | 0 | 0 | 0 | 0 |
| 69142 | 1 | 0 | 0 | 0 | 0 |
| 69143 | 1 | 0 | 0 | 0 | 0 |
| 70144 | 1 | 0 | 0 | 0 | 0 |
| 70145 | 1 | 0 | 0 | 0 | 0 |
| 70146 | 1 | 0 | 0 | 0 | 0 |
| 71147 | 1 | 0 | 0 | 0 | 0 |
| 71148 | 1 | 0 | 0 | 0 | 0 |
| 72149 | 1 | 0 | 0 | 0 | 0 |
| 73150 | 1 | 0 | 0 | 0 | 0 |
| 73151 | 1 | 0 | 0 | 0 | 0 |
| 73152 | 1 | 0 | 0 | 0 | 0 |
| 74153 | 1 | 0 | 0 | 0 | 0 |
| 74154 | 1 | 0 | 0 | 0 | 0 |
| 74155 | 1 | 0 | 0 | 0 | 0 |
| 75156 | 1 | 0 | 0 | 0 | 0 |
| 75157 | 1 | 0 | 0 | 0 | 0 |
| 75158 | 1 | 0 | 0 | 0 | 0 |
| 76159 | 1 | 0 | 0 | 0 | 0 |
| 77160 | 1 | 0 | 0 | 0 | 0 |
| 77161 | 1 | 0 | 0 | 0 | 0 |
| 77162 | 1 | 0 | 0 | 0 | 0 |
| 78163 | 1 | 0 | 0 | 0 | 0 |
| 78164 | 1 | 0 | 0 | 0 | 0 |
| 78165 | 1 | 0 | 0 | 0 | 0 |
| 79166 | 1 | 0 | 0 | 0 | 0 |

---

**Belantamab mafodotin**

## Chemical structure

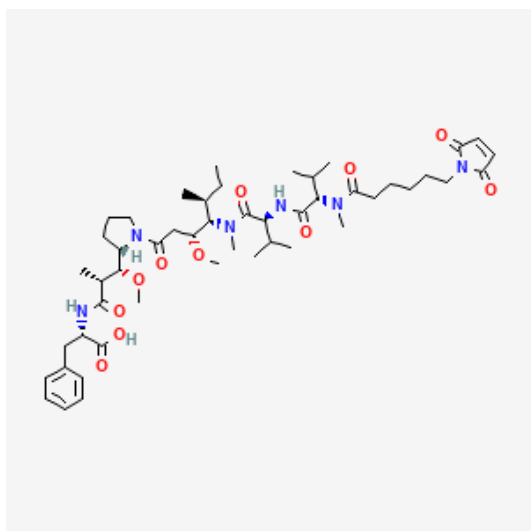

## Chemical formula

C<sub>49</sub>H<sub>76</sub>N<sub>6</sub>O<sub>11</sub>

| MOL file                                 | SMILE format                                                                                                              |
|------------------------------------------|---------------------------------------------------------------------------------------------------------------------------|
| APtclcactv10112212062D 0 0.00000 0.00000 | CCC(C)C(C(CC(=O)N1CCCC1C(OC)C(C)C(=O)NC(CC1=CC=CC=C1)C(O)=O)OC)N(C)C(=O)C(NC(=O)C(C(C)C)N(C)C(=O)CCCCN1C(=O)C=CC1=O)C(C)C |
| 142144 0 0 0 0 0 0 0 0999 V2000          |                                                                                                                           |
| 9.9888 5.0218 0.0000 C 0 0 0 0 0 0 0 0   |                                                                                                                           |
| 0 0 0 0                                  |                                                                                                                           |
| 10.1968 4.0436 0.0000 C 0 0 0 0 0 0 0 0  |                                                                                                                           |
| 0 0 0 0                                  |                                                                                                                           |
| 9.4536 3.3745 0.0000 C 0 0 0 0 0 0 0 0   |                                                                                                                           |
| 0 0 0 0                                  |                                                                                                                           |
| 8.5026 3.6835 0.0000 C 0 0 0 0 0 0 0 0   |                                                                                                                           |
| 0 0 0 0                                  |                                                                                                                           |
| 9.6615 2.3963 0.0000 C 0 0 0 0 0 0 0 0   |                                                                                                                           |
| 0 0 0 0                                  |                                                                                                                           |
| 8.9184 1.7272 0.0000 C 0 0 0 0 0 0 0 0   |                                                                                                                           |
| 0 0 0 0                                  |                                                                                                                           |
| 7.9673 2.0362 0.0000 C 0 0 0 0 0 0 0 0   |                                                                                                                           |
| 0 0 0 0                                  |                                                                                                                           |
| 7.2242 1.3671 0.0000 C 0 0 0 0 0 0 0 0   |                                                                                                                           |
| 0 0 0 0                                  |                                                                                                                           |
| 7.4321 0.3890 0.0000 O 0 0 0 0 0 0 0 0   |                                                                                                                           |
| 0 0 0 0                                  |                                                                                                                           |
| 6.2731 1.6761 0.0000 N 0 0 0 0 0 0 0 0   |                                                                                                                           |
| 0 0 0 0                                  |                                                                                                                           |
| 5.9641 2.6272 0.0000 C 0 0 0 0 0 0 0 0   |                                                                                                                           |
| 0 0 0 0                                  |                                                                                                                           |
| 4.9641 2.6272 0.0000 C 0 0 0 0 0 0 0 0   |                                                                                                                           |
| 0 0 0 0                                  |                                                                                                                           |

|   |   |   |   |         |         |          |   |   |   |   |   |   |   |   |
|---|---|---|---|---------|---------|----------|---|---|---|---|---|---|---|---|
| 0 | 0 | 0 | 0 | 4.6551  | 1.6761  | 0.0000 C | 0 | 0 | 0 | 0 | 0 | 0 | 0 | 0 |
| 0 | 0 | 0 | 0 | 5.4641  | 1.0883  | 0.0000 C | 0 | 0 | 0 | 0 | 0 | 0 | 0 | 0 |
| 0 | 0 | 0 | 0 | 5.4641  | 0.0883  | 0.0000 C | 0 | 0 | 0 | 0 | 0 | 0 | 0 | 0 |
| 0 | 0 | 0 | 0 | 6.3301  | -0.4117 | 0.0000 O | 0 | 0 | 0 | 0 | 0 | 0 | 0 | 0 |
| 0 | 0 | 0 | 0 | 6.3301  | -1.4117 | 0.0000 C | 0 | 0 | 0 | 0 | 0 | 0 | 0 | 0 |
| 0 | 0 | 0 | 0 | 4.5981  | -0.4117 | 0.0000 C | 0 | 0 | 0 | 0 | 0 | 0 | 0 | 0 |
| 0 | 0 | 0 | 0 | 3.7321  | 0.0883  | 0.0000 C | 0 | 0 | 0 | 0 | 0 | 0 | 0 | 0 |
| 0 | 0 | 0 | 0 | 4.5981  | -1.4117 | 0.0000 C | 0 | 0 | 0 | 0 | 0 | 0 | 0 | 0 |
| 0 | 0 | 0 | 0 | 5.4641  | -1.9117 | 0.0000 O | 0 | 0 | 0 | 0 | 0 | 0 | 0 | 0 |
| 0 | 0 | 0 | 0 | 3.7321  | -1.9117 | 0.0000 N | 0 | 0 | 0 | 0 | 0 | 0 | 0 | 0 |
| 0 | 0 | 0 | 0 | 3.7321  | -2.9117 | 0.0000 C | 0 | 0 | 0 | 0 | 0 | 0 | 0 | 0 |
| 0 | 0 | 0 | 0 | 2.8660  | -3.4117 | 0.0000 C | 0 | 0 | 0 | 0 | 0 | 0 | 0 | 0 |
| 0 | 0 | 0 | 0 | 2.8660  | -4.4117 | 0.0000 C | 0 | 0 | 0 | 0 | 0 | 0 | 0 | 0 |
| 0 | 0 | 0 | 0 | 2.0000  | -4.9117 | 0.0000 C | 0 | 0 | 0 | 0 | 0 | 0 | 0 | 0 |
| 0 | 0 | 0 | 0 | 2.0000  | -5.9117 | 0.0000 C | 0 | 0 | 0 | 0 | 0 | 0 | 0 | 0 |
| 0 | 0 | 0 | 0 | 2.8660  | -6.4117 | 0.0000 C | 0 | 0 | 0 | 0 | 0 | 0 | 0 | 0 |
| 0 | 0 | 0 | 0 | 3.7321  | -5.9117 | 0.0000 C | 0 | 0 | 0 | 0 | 0 | 0 | 0 | 0 |
| 0 | 0 | 0 | 0 | 3.7321  | -4.9117 | 0.0000 C | 0 | 0 | 0 | 0 | 0 | 0 | 0 | 0 |
| 0 | 0 | 0 | 0 | 4.5981  | -3.4117 | 0.0000 C | 0 | 0 | 0 | 0 | 0 | 0 | 0 | 0 |
| 0 | 0 | 0 | 0 | 5.4641  | -2.9117 | 0.0000 O | 0 | 0 | 0 | 0 | 0 | 0 | 0 | 0 |
| 0 | 0 | 0 | 0 | 4.5981  | -4.4117 | 0.0000 O | 0 | 0 | 0 | 0 | 0 | 0 | 0 | 0 |
| 0 | 0 | 0 | 0 | 9.1263  | 0.7491  | 0.0000 O | 0 | 0 | 0 | 0 | 0 | 0 | 0 | 0 |
| 0 | 0 | 0 | 0 | 10.0773 | 0.4401  | 0.0000 C | 0 | 0 | 0 | 0 | 0 | 0 | 0 | 0 |
| 0 | 0 | 0 | 0 | 10.6126 | 2.0873  | 0.0000 N | 0 | 0 | 0 | 0 | 0 | 0 | 0 | 0 |
| 0 | 0 | 0 | 0 | 10.8205 | 1.1092  | 0.0000 C | 0 | 0 | 0 | 0 | 0 | 0 | 0 | 0 |
| 0 | 0 | 0 | 0 | 11.3557 | 2.7565  | 0.0000 C | 0 | 0 | 0 | 0 | 0 | 0 | 0 | 0 |

|   |   |   |   |         |        |        |   |   |   |   |   |   |   |   |   |
|---|---|---|---|---------|--------|--------|---|---|---|---|---|---|---|---|---|
| 0 | 0 | 0 | 0 | 11.1478 | 3.7346 | 0.0000 | O | 0 | 0 | 0 | 0 | 0 | 0 | 0 | 0 |
| 0 | 0 | 0 | 0 | 12.3068 | 2.4474 | 0.0000 | C | 0 | 0 | 0 | 0 | 0 | 0 | 0 | 0 |
| 0 | 0 | 0 | 0 | 13.0499 | 3.1166 | 0.0000 | N | 0 | 0 | 0 | 0 | 0 | 0 | 0 | 0 |
| 0 | 0 | 0 | 0 | 14.0010 | 2.8076 | 0.0000 | C | 0 | 0 | 0 | 0 | 0 | 0 | 0 | 0 |
| 0 | 0 | 0 | 0 | 14.2089 | 1.8294 | 0.0000 | O | 0 | 0 | 0 | 0 | 0 | 0 | 0 | 0 |
| 0 | 0 | 0 | 0 | 14.7441 | 3.4767 | 0.0000 | C | 0 | 0 | 0 | 0 | 0 | 0 | 0 | 0 |
| 0 | 0 | 0 | 0 | 14.5362 | 4.4548 | 0.0000 | C | 0 | 0 | 0 | 0 | 0 | 0 | 0 | 0 |
| 0 | 0 | 0 | 0 | 15.2794 | 5.1240 | 0.0000 | C | 0 | 0 | 0 | 0 | 0 | 0 | 0 | 0 |
| 0 | 0 | 0 | 0 | 13.5852 | 4.7639 | 0.0000 | C | 0 | 0 | 0 | 0 | 0 | 0 | 0 | 0 |
| 0 | 0 | 0 | 0 | 15.6952 | 3.1677 | 0.0000 | N | 0 | 0 | 0 | 0 | 0 | 0 | 0 | 0 |
| 0 | 0 | 0 | 0 | 15.9031 | 2.1895 | 0.0000 | C | 0 | 0 | 0 | 0 | 0 | 0 | 0 | 0 |
| 0 | 0 | 0 | 0 | 16.4383 | 3.8368 | 0.0000 | C | 0 | 0 | 0 | 0 | 0 | 0 | 0 | 0 |
| 0 | 0 | 0 | 0 | 16.2304 | 4.8149 | 0.0000 | O | 0 | 0 | 0 | 0 | 0 | 0 | 0 | 0 |
| 0 | 0 | 0 | 0 | 17.3894 | 3.5278 | 0.0000 | C | 0 | 0 | 0 | 0 | 0 | 0 | 0 | 0 |
| 0 | 0 | 0 | 0 | 18.1325 | 4.1969 | 0.0000 | C | 0 | 0 | 0 | 0 | 0 | 0 | 0 | 0 |
| 0 | 0 | 0 | 0 | 19.0836 | 3.8879 | 0.0000 | C | 0 | 0 | 0 | 0 | 0 | 0 | 0 | 0 |
| 0 | 0 | 0 | 0 | 19.8267 | 4.5570 | 0.0000 | C | 0 | 0 | 0 | 0 | 0 | 0 | 0 | 0 |
| 0 | 0 | 0 | 0 | 20.7778 | 4.2480 | 0.0000 | C | 0 | 0 | 0 | 0 | 0 | 0 | 0 | 0 |
| 0 | 0 | 0 | 0 | 21.5209 | 4.9171 | 0.0000 | N | 0 | 0 | 0 | 0 | 0 | 0 | 0 | 0 |
| 0 | 0 | 0 | 0 | 22.4991 | 4.7092 | 0.0000 | C | 0 | 0 | 0 | 0 | 0 | 0 | 0 | 0 |
| 0 | 0 | 0 | 0 | 22.9058 | 3.7957 | 0.0000 | O | 0 | 0 | 0 | 0 | 0 | 0 | 0 | 0 |
| 0 | 0 | 0 | 0 | 22.9991 | 5.5753 | 0.0000 | C | 0 | 0 | 0 | 0 | 0 | 0 | 0 | 0 |
| 0 | 0 | 0 | 0 | 22.3299 | 6.3184 | 0.0000 | C | 0 | 0 | 0 | 0 | 0 | 0 | 0 | 0 |
| 0 | 0 | 0 | 0 | 21.4164 | 5.9117 | 0.0000 | C | 0 | 0 | 0 | 0 | 0 | 0 | 0 | 0 |
| 0 | 0 | 0 | 0 | 20.5504 | 6.4117 | 0.0000 | O | 0 | 0 | 0 | 0 | 0 | 0 | 0 | 0 |
| 0 | 0 | 0 | 0 | 12.5147 | 1.4693 | 0.0000 | C | 0 | 0 | 0 | 0 | 0 | 0 | 0 | 0 |



|   |   |   |   |         |         |          |   |   |   |   |   |   |   |   |
|---|---|---|---|---------|---------|----------|---|---|---|---|---|---|---|---|
| 0 | 0 | 0 | 0 | 13.4657 | 1.1603  | 0.0000 C | 0 | 0 | 0 | 0 | 0 | 0 | 0 | 0 |
| 0 | 0 | 0 | 0 | 11.7715 | 0.8002  | 0.0000 C | 0 | 0 | 0 | 0 | 0 | 0 | 0 | 0 |
| 0 | 0 | 0 | 0 | 10.5953 | 5.1507  | 0.0000 H | 0 | 0 | 0 | 0 | 0 | 0 | 0 | 0 |
| 0 | 0 | 0 | 0 | 9.8599  | 5.6282  | 0.0000 H | 0 | 0 | 0 | 0 | 0 | 0 | 0 | 0 |
| 0 | 0 | 0 | 0 | 9.3824  | 4.8929  | 0.0000 H | 0 | 0 | 0 | 0 | 0 | 0 | 0 | 0 |
| 0 | 0 | 0 | 0 | 10.5253 | 3.5178  | 0.0000 H | 0 | 0 | 0 | 0 | 0 | 0 | 0 | 0 |
| 0 | 0 | 0 | 0 | 10.7716 | 4.2759  | 0.0000 H | 0 | 0 | 0 | 0 | 0 | 0 | 0 | 0 |
| 0 | 0 | 0 | 0 | 9.3247  | 3.9809  | 0.0000 H | 0 | 0 | 0 | 0 | 0 | 0 | 0 | 0 |
| 0 | 0 | 0 | 0 | 8.6941  | 4.2732  | 0.0000 H | 0 | 0 | 0 | 0 | 0 | 0 | 0 | 0 |
| 0 | 0 | 0 | 0 | 7.9129  | 3.8751  | 0.0000 H | 0 | 0 | 0 | 0 | 0 | 0 | 0 | 0 |
| 0 | 0 | 0 | 0 | 8.3110  | 3.0939  | 0.0000 H | 0 | 0 | 0 | 0 | 0 | 0 | 0 | 0 |
| 0 | 0 | 0 | 0 | 10.1223 | 2.8112  | 0.0000 H | 0 | 0 | 0 | 0 | 0 | 0 | 0 | 0 |
| 0 | 0 | 0 | 0 | 9.5080  | 1.5356  | 0.0000 H | 0 | 0 | 0 | 0 | 0 | 0 | 0 | 0 |
| 0 | 0 | 0 | 0 | 8.2584  | 2.5837  | 0.0000 H | 0 | 0 | 0 | 0 | 0 | 0 | 0 | 0 |
| 0 | 0 | 0 | 0 | 7.4788  | 2.4179  | 0.0000 H | 0 | 0 | 0 | 0 | 0 | 0 | 0 | 0 |
| 0 | 0 | 0 | 0 | 6.5706  | 2.7561  | 0.0000 H | 0 | 0 | 0 | 0 | 0 | 0 | 0 | 0 |
| 0 | 0 | 0 | 0 | 5.8993  | 3.2438  | 0.0000 H | 0 | 0 | 0 | 0 | 0 | 0 | 0 | 0 |
| 0 | 0 | 0 | 0 | 5.0289  | 3.2438  | 0.0000 H | 0 | 0 | 0 | 0 | 0 | 0 | 0 | 0 |
| 0 | 0 | 0 | 0 | 4.3577  | 2.7561  | 0.0000 H | 0 | 0 | 0 | 0 | 0 | 0 | 0 | 0 |
| 0 | 0 | 0 | 0 | 4.0887  | 1.9283  | 0.0000 H | 0 | 0 | 0 | 0 | 0 | 0 | 0 | 0 |
| 0 | 0 | 0 | 0 | 4.3451  | 1.1392  | 0.0000 H | 0 | 0 | 0 | 0 | 0 | 0 | 0 | 0 |
| 0 | 0 | 0 | 0 | 6.0165  | 0.8069  | 0.0000 H | 0 | 0 | 0 | 0 | 0 | 0 | 0 | 0 |
| 0 | 0 | 0 | 0 | 5.4641  | -0.5317 | 0.0000 H | 0 | 0 | 0 | 0 | 0 | 0 | 0 | 0 |
| 0 | 0 | 0 | 0 | 5.7101  | -1.4117 | 0.0000 H | 0 | 0 | 0 | 0 | 0 | 0 | 0 | 0 |
| 0 | 0 | 0 | 0 | 6.3301  | -2.0317 | 0.0000 H | 0 | 0 | 0 | 0 | 0 | 0 | 0 | 0 |
| 0 | 0 | 0 | 0 | 6.9501  | -1.4117 | 0.0000 H | 0 | 0 | 0 | 0 | 0 | 0 | 0 | 0 |

|         |         |          |   |   |   |   |   |   |   |   |   |   |
|---------|---------|----------|---|---|---|---|---|---|---|---|---|---|
| 4.5981  | 0.2083  | 0.0000 H | 0 | 0 | 0 | 0 | 0 | 0 | 0 | 0 | 0 | 0 |
| 0       | 0       | 0        | 0 |   |   |   |   |   |   |   |   |   |
| 4.0421  | 0.6253  | 0.0000 H | 0 | 0 | 0 | 0 | 0 | 0 | 0 | 0 | 0 | 0 |
| 0       | 0       | 0        | 0 |   |   |   |   |   |   |   |   |   |
| 3.1951  | 0.3983  | 0.0000 H | 0 | 0 | 0 | 0 | 0 | 0 | 0 | 0 | 0 | 0 |
| 0       | 0       | 0        | 0 |   |   |   |   |   |   |   |   |   |
| 3.4221  | -0.4486 | 0.0000 H | 0 | 0 | 0 | 0 | 0 | 0 | 0 | 0 | 0 | 0 |
| 0       | 0       | 0        | 0 |   |   |   |   |   |   |   |   |   |
| 3.1951  | -1.6017 | 0.0000 H | 0 | 0 | 0 | 0 | 0 | 0 | 0 | 0 | 0 | 0 |
| 0       | 0       | 0        | 0 |   |   |   |   |   |   |   |   |   |
| 4.2690  | -2.6017 | 0.0000 H | 0 | 0 | 0 | 0 | 0 | 0 | 0 | 0 | 0 | 0 |
| 0       | 0       | 0        | 0 |   |   |   |   |   |   |   |   |   |
| 2.6540  | -2.8291 | 0.0000 H | 0 | 0 | 0 | 0 | 0 | 0 | 0 | 0 | 0 | 0 |
| 0       | 0       | 0        | 0 |   |   |   |   |   |   |   |   |   |
| 2.2554  | -3.5193 | 0.0000 H | 0 | 0 | 0 | 0 | 0 | 0 | 0 | 0 | 0 | 0 |
| 0       | 0       | 0        | 0 |   |   |   |   |   |   |   |   |   |
| 1.4631  | -4.6017 | 0.0000 H | 0 | 0 | 0 | 0 | 0 | 0 | 0 | 0 | 0 | 0 |
| 0       | 0       | 0        | 0 |   |   |   |   |   |   |   |   |   |
| 1.4631  | -6.2217 | 0.0000 H | 0 | 0 | 0 | 0 | 0 | 0 | 0 | 0 | 0 | 0 |
| 0       | 0       | 0        | 0 |   |   |   |   |   |   |   |   |   |
| 2.8660  | -7.0317 | 0.0000 H | 0 | 0 | 0 | 0 | 0 | 0 | 0 | 0 | 0 | 0 |
| 0       | 0       | 0        | 0 |   |   |   |   |   |   |   |   |   |
| 4.2690  | -6.2217 | 0.0000 H | 0 | 0 | 0 | 0 | 0 | 0 | 0 | 0 | 0 | 0 |
| 0       | 0       | 0        | 0 |   |   |   |   |   |   |   |   |   |
| 4.2690  | -4.6017 | 0.0000 H | 0 | 0 | 0 | 0 | 0 | 0 | 0 | 0 | 0 | 0 |
| 0       | 0       | 0        | 0 |   |   |   |   |   |   |   |   |   |
| 6.0010  | -3.2217 | 0.0000 H | 0 | 0 | 0 | 0 | 0 | 0 | 0 | 0 | 0 | 0 |
| 0       | 0       | 0        | 0 |   |   |   |   |   |   |   |   |   |
| 9.8858  | -0.1496 | 0.0000 H | 0 | 0 | 0 | 0 | 0 | 0 | 0 | 0 | 0 | 0 |
| 0       | 0       | 0        | 0 |   |   |   |   |   |   |   |   |   |
| 10.6670 | 0.2485  | 0.0000 H | 0 | 0 | 0 | 0 | 0 | 0 | 0 | 0 | 0 | 0 |
| 0       | 0       | 0        | 0 |   |   |   |   |   |   |   |   |   |
| 10.2689 | 1.0297  | 0.0000 H | 0 | 0 | 0 | 0 | 0 | 0 | 0 | 0 | 0 | 0 |
| 0       | 0       | 0        | 0 |   |   |   |   |   |   |   |   |   |
| 10.2140 | 0.9803  | 0.0000 H | 0 | 0 | 0 | 0 | 0 | 0 | 0 | 0 | 0 | 0 |
| 0       | 0       | 0        | 0 |   |   |   |   |   |   |   |   |   |
| 10.9494 | 0.5027  | 0.0000 H | 0 | 0 | 0 | 0 | 0 | 0 | 0 | 0 | 0 | 0 |
| 0       | 0       | 0        | 0 |   |   |   |   |   |   |   |   |   |
| 11.4269 | 1.2381  | 0.0000 H | 0 | 0 | 0 | 0 | 0 | 0 | 0 | 0 | 0 | 0 |
| 0       | 0       | 0        | 0 |   |   |   |   |   |   |   |   |   |
| 12.1779 | 3.0539  | 0.0000 H | 0 | 0 | 0 | 0 | 0 | 0 | 0 | 0 | 0 | 0 |
| 0       | 0       | 0        | 0 |   |   |   |   |   |   |   |   |   |
| 12.9210 | 3.7230  | 0.0000 H | 0 | 0 | 0 | 0 | 0 | 0 | 0 | 0 | 0 | 0 |
| 0       | 0       | 0        | 0 |   |   |   |   |   |   |   |   |   |
| 14.8730 | 2.8702  | 0.0000 H | 0 | 0 | 0 | 0 | 0 | 0 | 0 | 0 | 0 | 0 |
| 0       | 0       | 0        | 0 |   |   |   |   |   |   |   |   |   |
| 15.1259 | 4.2632  | 0.0000 H | 0 | 0 | 0 | 0 | 0 | 0 | 0 | 0 | 0 | 0 |
| 0       | 0       | 0        | 0 |   |   |   |   |   |   |   |   |   |
| 15.6942 | 4.6632  | 0.0000 H | 0 | 0 | 0 | 0 | 0 | 0 | 0 | 0 | 0 | 0 |
| 0       | 0       | 0        | 0 |   |   |   |   |   |   |   |   |   |
| 15.7401 | 5.5388  | 0.0000 H |   |   |   |   |   |   |   |   |   |   |

|   |   |   |   |         |        |        |   |   |   |   |   |   |   |   |   |
|---|---|---|---|---------|--------|--------|---|---|---|---|---|---|---|---|---|
| 0 | 0 | 0 | 0 | 14.8645 | 5.5847 | 0.0000 | H | 0 | 0 | 0 | 0 | 0 | 0 | 0 | 0 |
| 0 | 0 | 0 | 0 | 13.7767 | 5.3535 | 0.0000 | H | 0 | 0 | 0 | 0 | 0 | 0 | 0 | 0 |
| 0 | 0 | 0 | 0 | 12.9955 | 4.9554 | 0.0000 | H | 0 | 0 | 0 | 0 | 0 | 0 | 0 | 0 |
| 0 | 0 | 0 | 0 | 13.3936 | 4.1742 | 0.0000 | H | 0 | 0 | 0 | 0 | 0 | 0 | 0 | 0 |
| 0 | 0 | 0 | 0 | 15.2966 | 2.0606 | 0.0000 | H | 0 | 0 | 0 | 0 | 0 | 0 | 0 | 0 |
| 0 | 0 | 0 | 0 | 16.0320 | 1.5831 | 0.0000 | H | 0 | 0 | 0 | 0 | 0 | 0 | 0 | 0 |
| 0 | 0 | 0 | 0 | 16.5095 | 2.3184 | 0.0000 | H | 0 | 0 | 0 | 0 | 0 | 0 | 0 | 0 |
| 0 | 0 | 0 | 0 | 17.0983 | 2.9804 | 0.0000 | H | 0 | 0 | 0 | 0 | 0 | 0 | 0 | 0 |
| 0 | 0 | 0 | 0 | 17.8780 | 3.1461 | 0.0000 | H | 0 | 0 | 0 | 0 | 0 | 0 | 0 | 0 |
| 0 | 0 | 0 | 0 | 18.4236 | 4.7443 | 0.0000 | H | 0 | 0 | 0 | 0 | 0 | 0 | 0 | 0 |
| 0 | 0 | 0 | 0 | 17.6440 | 4.5786 | 0.0000 | H | 0 | 0 | 0 | 0 | 0 | 0 | 0 | 0 |
| 0 | 0 | 0 | 0 | 18.7925 | 3.3405 | 0.0000 | H | 0 | 0 | 0 | 0 | 0 | 0 | 0 | 0 |
| 0 | 0 | 0 | 0 | 19.5722 | 3.5062 | 0.0000 | H | 0 | 0 | 0 | 0 | 0 | 0 | 0 | 0 |
| 0 | 0 | 0 | 0 | 20.1178 | 5.1045 | 0.0000 | H | 0 | 0 | 0 | 0 | 0 | 0 | 0 | 0 |
| 0 | 0 | 0 | 0 | 19.3382 | 4.9387 | 0.0000 | H | 0 | 0 | 0 | 0 | 0 | 0 | 0 | 0 |
| 0 | 0 | 0 | 0 | 20.4867 | 3.7006 | 0.0000 | H | 0 | 0 | 0 | 0 | 0 | 0 | 0 | 0 |
| 0 | 0 | 0 | 0 | 21.2664 | 3.8663 | 0.0000 | H | 0 | 0 | 0 | 0 | 0 | 0 | 0 | 0 |
| 0 | 0 | 0 | 0 | 23.6157 | 5.6401 | 0.0000 | H | 0 | 0 | 0 | 0 | 0 | 0 | 0 | 0 |
| 0 | 0 | 0 | 0 | 22.4589 | 6.9249 | 0.0000 | H | 0 | 0 | 0 | 0 | 0 | 0 | 0 | 0 |
| 0 | 0 | 0 | 0 | 11.9250 | 1.6609 | 0.0000 | H | 0 | 0 | 0 | 0 | 0 | 0 | 0 | 0 |
| 0 | 0 | 0 | 0 | 13.2742 | 0.5706 | 0.0000 | H | 0 | 0 | 0 | 0 | 0 | 0 | 0 | 0 |
| 0 | 0 | 0 | 0 | 14.0554 | 0.9687 | 0.0000 | H | 0 | 0 | 0 | 0 | 0 | 0 | 0 | 0 |
| 0 | 0 | 0 | 0 | 13.6573 | 1.7499 | 0.0000 | H | 0 | 0 | 0 | 0 | 0 | 0 | 0 | 0 |
| 0 | 0 | 0 | 0 | 11.3567 | 1.2609 | 0.0000 | H | 0 | 0 | 0 | 0 | 0 | 0 | 0 | 0 |
| 0 | 0 | 0 | 0 | 11.3108 | 0.3853 | 0.0000 | H | 0 | 0 | 0 | 0 | 0 | 0 | 0 | 0 |
| 0 | 0 | 0 | 0 | 12.1864 | 0.3394 | 0.0000 | H | 0 | 0 | 0 | 0 | 0 | 0 | 0 | 0 |

---

1 2 1 0 0 0 0  
2 3 1 0 0 0 0  
3 4 1 0 0 0 0  
3 5 1 0 0 0 0  
5 6 1 0 0 0 0  
6 7 1 0 0 0 0  
7 8 1 0 0 0 0  
8 9 2 0 0 0 0  
8 10 1 0 0 0 0  
10 11 1 0 0 0 0  
11 12 1 0 0 0 0  
12 13 1 0 0 0 0  
13 14 1 0 0 0 0  
10 14 1 0 0 0 0  
14 15 1 0 0 0 0  
15 16 1 0 0 0 0  
16 17 1 0 0 0 0  
15 18 1 0 0 0 0  
18 19 1 0 0 0 0  
18 20 1 0 0 0 0  
20 21 2 0 0 0 0  
20 22 1 0 0 0 0  
22 23 1 0 0 0 0  
23 24 1 0 0 0 0  
24 25 1 0 0 0 0  
25 26 2 0 0 0 0  
26 27 1 0 0 0 0  
27 28 2 0 0 0 0  
28 29 1 0 0 0 0  
29 30 2 0 0 0 0  
25 30 1 0 0 0 0  
23 31 1 0 0 0 0  
31 32 1 0 0 0 0  
31 33 2 0 0 0 0  
6 34 1 0 0 0 0  
34 35 1 0 0 0 0  
5 36 1 0 0 0 0  
36 37 1 0 0 0 0  
36 38 1 0 0 0 0  
38 39 2 0 0 0 0  
38 40 1 0 0 0 0  
40 41 1 0 0 0 0  
41 42 1 0 0 0 0  
42 43 2 0 0 0 0  
42 44 1 0 0 0 0  
44 45 1 0 0 0 0  
45 46 1 0 0 0 0  
45 47 1 0 0 0 0  
44 48 1 0 0 0 0  
48 49 1 0 0 0 0  
48 50 1 0 0 0 0  
50 51 2 0 0 0 0

---

---

|    |     |   |   |   |   |   |
|----|-----|---|---|---|---|---|
| 50 | 52  | 1 | 0 | 0 | 0 | 0 |
| 52 | 53  | 1 | 0 | 0 | 0 | 0 |
| 53 | 54  | 1 | 0 | 0 | 0 | 0 |
| 54 | 55  | 1 | 0 | 0 | 0 | 0 |
| 55 | 56  | 1 | 0 | 0 | 0 | 0 |
| 56 | 57  | 1 | 0 | 0 | 0 | 0 |
| 57 | 58  | 1 | 0 | 0 | 0 | 0 |
| 58 | 59  | 2 | 0 | 0 | 0 | 0 |
| 58 | 60  | 1 | 0 | 0 | 0 | 0 |
| 60 | 61  | 2 | 0 | 0 | 0 | 0 |
| 61 | 62  | 1 | 0 | 0 | 0 | 0 |
| 57 | 62  | 1 | 0 | 0 | 0 | 0 |
| 62 | 63  | 2 | 0 | 0 | 0 | 0 |
| 40 | 64  | 1 | 0 | 0 | 0 | 0 |
| 64 | 65  | 1 | 0 | 0 | 0 | 0 |
| 64 | 66  | 1 | 0 | 0 | 0 | 0 |
| 1  | 67  | 1 | 0 | 0 | 0 | 0 |
| 1  | 68  | 1 | 0 | 0 | 0 | 0 |
| 1  | 69  | 1 | 0 | 0 | 0 | 0 |
| 2  | 70  | 1 | 0 | 0 | 0 | 0 |
| 2  | 71  | 1 | 0 | 0 | 0 | 0 |
| 3  | 72  | 1 | 0 | 0 | 0 | 0 |
| 4  | 73  | 1 | 0 | 0 | 0 | 0 |
| 4  | 74  | 1 | 0 | 0 | 0 | 0 |
| 4  | 75  | 1 | 0 | 0 | 0 | 0 |
| 5  | 76  | 1 | 0 | 0 | 0 | 0 |
| 6  | 77  | 1 | 0 | 0 | 0 | 0 |
| 7  | 78  | 1 | 0 | 0 | 0 | 0 |
| 7  | 79  | 1 | 0 | 0 | 0 | 0 |
| 11 | 80  | 1 | 0 | 0 | 0 | 0 |
| 11 | 81  | 1 | 0 | 0 | 0 | 0 |
| 12 | 82  | 1 | 0 | 0 | 0 | 0 |
| 12 | 83  | 1 | 0 | 0 | 0 | 0 |
| 13 | 84  | 1 | 0 | 0 | 0 | 0 |
| 13 | 85  | 1 | 0 | 0 | 0 | 0 |
| 14 | 86  | 1 | 0 | 0 | 0 | 0 |
| 15 | 87  | 1 | 0 | 0 | 0 | 0 |
| 17 | 88  | 1 | 0 | 0 | 0 | 0 |
| 17 | 89  | 1 | 0 | 0 | 0 | 0 |
| 17 | 90  | 1 | 0 | 0 | 0 | 0 |
| 18 | 91  | 1 | 0 | 0 | 0 | 0 |
| 19 | 92  | 1 | 0 | 0 | 0 | 0 |
| 19 | 93  | 1 | 0 | 0 | 0 | 0 |
| 19 | 94  | 1 | 0 | 0 | 0 | 0 |
| 22 | 95  | 1 | 0 | 0 | 0 | 0 |
| 23 | 96  | 1 | 0 | 0 | 0 | 0 |
| 24 | 97  | 1 | 0 | 0 | 0 | 0 |
| 24 | 98  | 1 | 0 | 0 | 0 | 0 |
| 26 | 99  | 1 | 0 | 0 | 0 | 0 |
| 27 | 100 | 1 | 0 | 0 | 0 | 0 |
| 28 | 101 | 1 | 0 | 0 | 0 | 0 |
| 29 | 102 | 1 | 0 | 0 | 0 | 0 |

---

---

30103 1 0 0 0 0  
32104 1 0 0 0 0  
35105 1 0 0 0 0  
35106 1 0 0 0 0  
35107 1 0 0 0 0  
37108 1 0 0 0 0  
37109 1 0 0 0 0  
37110 1 0 0 0 0  
40111 1 0 0 0 0  
41112 1 0 0 0 0  
44113 1 0 0 0 0  
45114 1 0 0 0 0  
46115 1 0 0 0 0  
46116 1 0 0 0 0  
46117 1 0 0 0 0  
47118 1 0 0 0 0  
47119 1 0 0 0 0  
47120 1 0 0 0 0  
49121 1 0 0 0 0  
49122 1 0 0 0 0  
49123 1 0 0 0 0  
52124 1 0 0 0 0  
52125 1 0 0 0 0  
53126 1 0 0 0 0  
53127 1 0 0 0 0  
54128 1 0 0 0 0  
54129 1 0 0 0 0  
55130 1 0 0 0 0  
55131 1 0 0 0 0  
56132 1 0 0 0 0  
56133 1 0 0 0 0  
60134 1 0 0 0 0  
61135 1 0 0 0 0  
64136 1 0 0 0 0  
65137 1 0 0 0 0  
65138 1 0 0 0 0  
65139 1 0 0 0 0  
66140 1 0 0 0 0  
66141 1 0 0 0 0  
66142 1 0 0 0 0

M END

\$\$\$\$

---

---
